## Correction: Is alkaline phosphatase the smoking gun for highly refractory primitive leukemic cells?

**Laura G. Rico<sup>1</sup>, Jordi Juncà<sup>1</sup>, Mike D. Ward<sup>2</sup>, Jolene Bradford<sup>2</sup> and Jordi Petriz<sup>1</sup>**

<sup>1</sup> Josep Carreras Leukemia Research Institute, Universitat Autònoma de Barcelona, Spain

<sup>2</sup> Thermo Fisher Scientific, Eugene, Oregon, USA

**Published:** March 19, 2019

**Copyright:** Rico et al. This is an open-access article distributed under the terms of the Creative Commons Attribution License 3.0 (CC BY 3.0), which permits unrestricted use, distribution, and reproduction in any medium, provided the original author and source are credited.

**This article has been corrected:** The correct affiliation information is given below:

<sup>1</sup> Josep Carreras Leukemia Research Institute, Universitat Autònoma de Barcelona, Spain

Original article: Oncotarget. 2016; 7:72057-72066. <https://doi.org/10.18632/oncotarget.12497>
